# Supplementary material for: Sensitive and specific post-call filtering of genetic variants in xenograft and primary tumors
Source: Oxford University Press journal article supplement (doi:10.1093/bioinformatics/bty010), 2018-01-05
Supplement: bioinformatics_34_10_1713_s1.pdf [file bioinformatics_34_10_1713_s1.pdf]

Supplemental Figures and Table for Mannakee et al. “Sensitive and specific post-call filtering of genetic variants in xenograft and primary tumors”

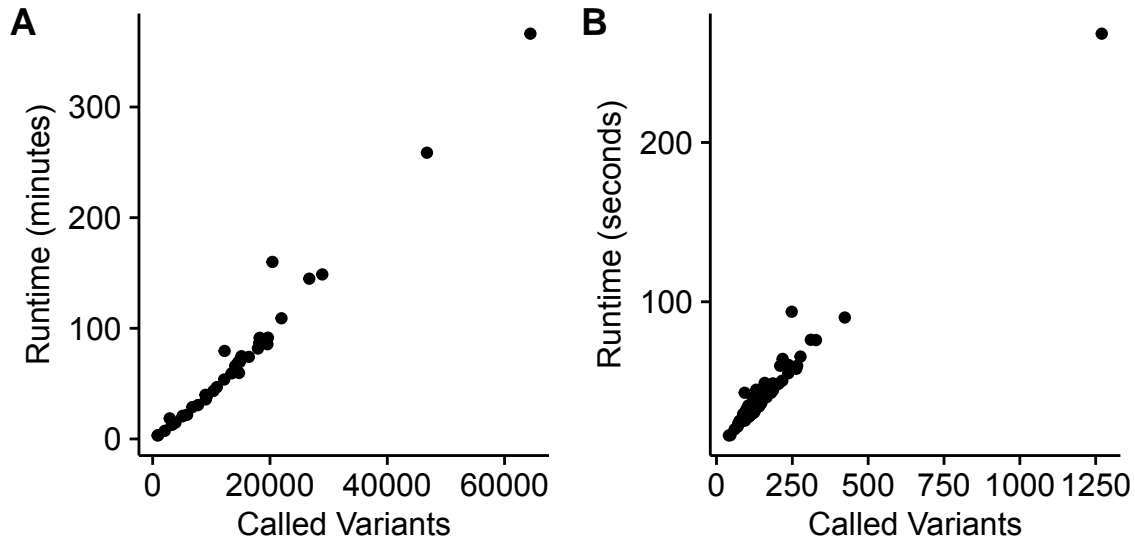

Figure S1: *mapexr* timing for A: xenografts and B: primary tumors. Shown are results from running on 4 cores and filtering all MuTect 1.1.1 calls for each sample. Run time is linear in the number of input variants, roughly one minute per 250 variants. One strategy for reducing run time is to first filter to keep only variants of interest, such as non-synonymous coding variants.

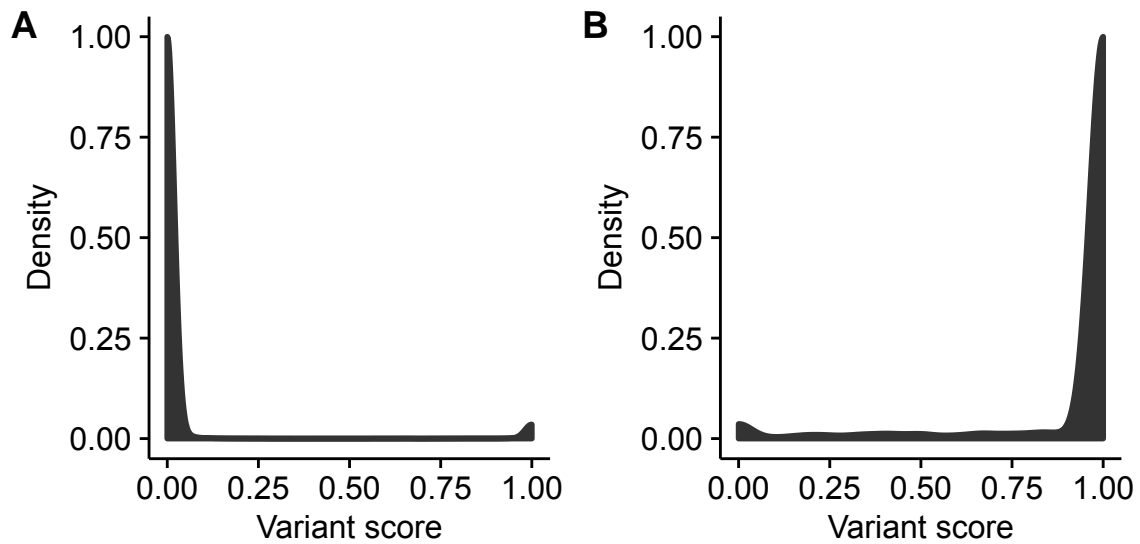

Figure S2: Distribution of MAPEX variant scores when using MuTect 1.1.1 for calling. A: n=34 PDX samples and B: n=93 primary samples.

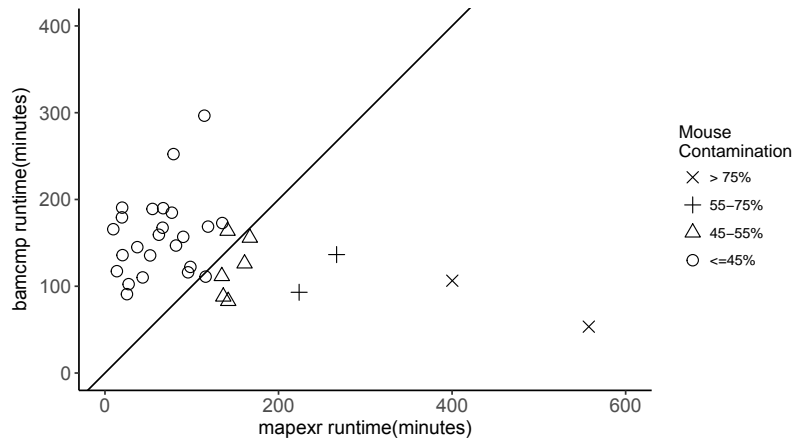

Figure S3: Comparison of the post-alignment run time between `bamcmp` and `mapexr`. The comparison was run on 4 cores. Except at extreme levels of mouse contamination, `mapexr` is faster than `bamcmp`.

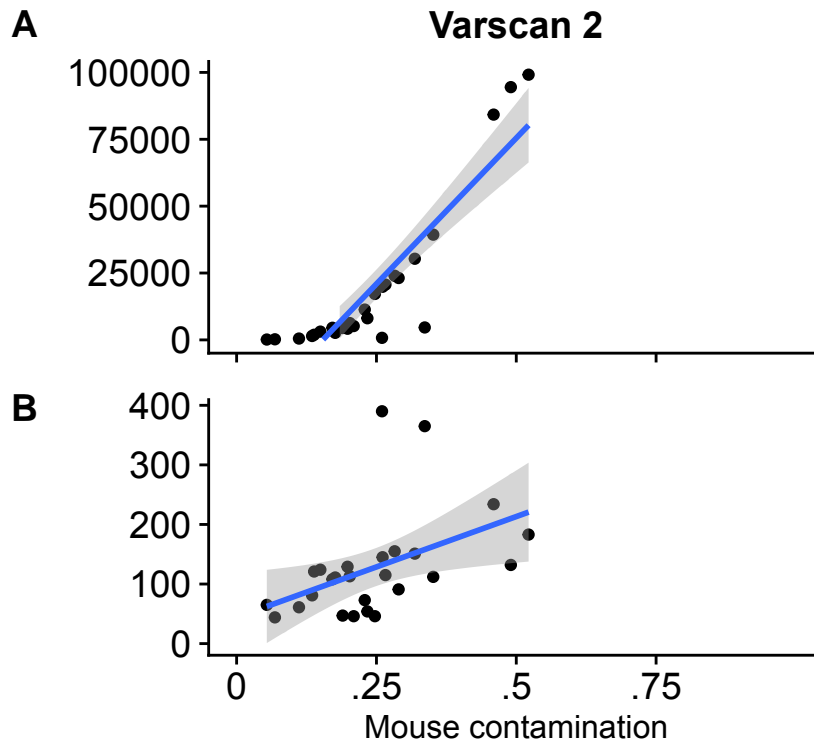

Figure S4: Xenograft analysis for Varscan 2 without additional post-calling filters. Without post-calling filters, Varscan 2 generates a very large number of calls, and the number of variants called after MAPEX filtering is positively correlated with mouse contamination. (Two samples are not included because the unfiltered callset was over 200,000 variants, and thus too large for `mapexr` to run in a reasonable time.)

Table S1: MAPEX removes many potentially spurious PDX variants and retains almost all likely real variants that are also found in the primary.

| PDX                      | Total variants in PDX |             | Primary variants in PDX |             |                            |
|--------------------------|-----------------------|-------------|-------------------------|-------------|----------------------------|
|                          | Before MAPEX          | After MAPEX | Before MAPEX            | After MAPEX | Fraction retained by MAPEX |
| EMC1229x1a1              | 2086                  | 30          | 7                       | 7           | 1.00                       |
| EMC828o3a5               | 1734                  | 46          | 27                      | 27          | 1.00                       |
| EMC828x2a3               | 1417                  | 45          | 28                      | 28          | 1.00                       |
| EMC828x2b2               | 1461                  | 50          | 29                      | 29          | 1.00                       |
| EMC828x3b1               | 228                   | 37          | 29                      | 29          | 1.00                       |
| EMC129x2b1               | 688                   | 31          | 28                      | 28          | 1.00                       |
| EMC1222o2a1              | 162                   | 62          | 38                      | 38          | 1.00                       |
| EMC1222o2a2              | 415                   | 55          | 38                      | 37          | 0.97                       |
| EMC1222o2a3              | 556                   | 58          | 39                      | 38          | 0.97                       |
| EMC1222o2a3duodenalMet   | 814                   | 54          | 37                      | 36          | 0.97                       |
| EMC1222o2a3omentalMet    | 390                   | 50          | 38                      | 37          | 0.97                       |
| EMC1222o2a3peritonealMet | 379                   | 57          | 38                      | 37          | 0.97                       |
| EMC1222o2a3skinMet       | 951                   | 59          | 38                      | 37          | 0.97                       |
| EMC1222o2a3spleenMet     | 1508                  | 62          | 38                      | 37          | 0.97                       |
| EMC1222x1b1              | 639                   | 52          | 39                      | 39          | 1.00                       |
| EMC1222x3a1              | 545                   | 69          | 38                      | 37          | 0.97                       |
| EMC1222x3c2              | 157                   | 64          | 38                      | 38          | 1.00                       |
| EMC226o1a5               | 1495                  | 78          | 64                      | 64          | 1.00                       |
| EMC226o1a5met            | 2820                  | 77          | 63                      | 62          | 0.98                       |
| EMC226x1a1               | 1229                  | 71          | 64                      | 64          | 1.00                       |
| EMC226x1a2               | 1468                  | 72          | 67                      | 66          | 0.99                       |
| EMC26o1a2                | 1828                  | 30          | 17                      | 17          | 1.00                       |
| EMC29o1a1                | 6559                  | 38          | 24                      | 24          | 1.00                       |
| EMC29o1a1liverMet        | 4744                  | 42          | 28                      | 28          | 1.00                       |
| EMC29o1a1liverMet_1      | 2981                  | 42          | 28                      | 28          | 1.00                       |
| EMC29o1a1peritonealMet   | 1421                  | 45          | 29                      | 29          | 1.00                       |
| EMC29o1a1spleenMet       | 1154                  | 43          | 28                      | 28          | 1.00                       |
| EMC29o1a2                | 1983                  | 41          | 27                      | 27          | 1.00                       |
| EMC519x1a1               | 926                   | 23          | 14                      | 14          | 1.00                       |
| EMC93o2a3                | 1122                  | 81          | 45                      | 45          | 1.00                       |
| EMC93o2a3periMet         | 2074                  | 65          | 44                      | 44          | 1.00                       |
| EMC93o2a3spleenMet       | 2330                  | 91          | 45                      | 45          | 1.00                       |
| EMC93x1a1                | 988                   | 92          | 45                      | 45          | 1.00                       |
